# Supplementary material for: Kinetics of the chromosome 14 microRNA cluster ortholog and its potential role during placental development in the pregnant mare
Source: BMC Genomics. 2018 Dec 20;19:954. doi: 10.1186/s12864-018-5341-2 (PMC6302407; doi:10.1186/s12864-018-5341-2)
Supplement: Supplementary file 5 — Table S5. Primer sequences for genes which were indicated in our dataset to be involved in angiogenesis. (XLSX 10 kb) [file 12864_2018_5341_MOESM5_ESM.xlsx]

## Sheet: Sheet1
Additional Table 5. Primer sequences for genes which were indicated in our dataset to be involved in angiogenesis
Angiogenic Gene (Gene symbol)	Sequence 5′-3′
ACVRL1
	Forward	CATGGCTCGCTCTACGACTT
	Reverse	CTGCGTGCCGAAGATCTCTA
AXL
	Forward	AAGCATCTGTTCCCCCTCAC
	Reverse	CCACCCGGATGTGATAAGGG
CXCL10
	Forward	TGCACGCTGTACCTGCATTA
	Reverse	ACGTTGACAAGATTGACTTGCAG
DVL1
	Forward	CTGACAGCACGTCCACTGT
	Reverse	TGTGTTGTCATCCTCGTCTGA
EDNRA
	Forward	GGAGGGCCAAATTAGTGGGT
	Reverse	GGTGGAGGATTTCACCGCTT
EPN2
	Forward	CTCTCAGCCTTCAGACGCTC
	Reverse	TATCGACCGTGATGGCAAGG
G6PD
	Forward	GATGTTCTTGGTGACGGCCT
	Reverse	ACAGCCATATGAACGCCCTT
JAM2
	Forward	GAAGGGAATCCAGCTCCTGAA
	Reverse	TGCTTTGGGAGCCAACTTTTG
NRP1
	Forward	CTTTGACCTGGAGCCTGACT
	Reverse	CCAGATTTCTAGCCGGTCGT
TYRO3
	Forward	AAGGGCACCCAGTCAGCATA
	Reverse	ACCTGCCACCAACTATAGCC
