# Supplementary material for: Kinetics of the chromosome 14 microRNA cluster ortholog and its potential role during placental development in the pregnant mare
Source: BMC Genomics. 2018 Dec 20;19:954. doi: 10.1186/s12864-018-5341-2 (PMC6302407; doi:10.1186/s12864-018-5341-2)
Supplement: Supplementary file 9 — Table S9. List of canonical pathways predicted for C24MC-associated miRNAs with IPA. (XLS 41 kb) [file 12864_2018_5341_MOESM9_ESM.xls]

## Sheet: Sheet0
Additional Table 9. List of canonical pathways predicted for C24MC-associated miRNAs with IPA
Canonical Pathways	-log(p-value)	Ratio	Molecules
Axonal Guidance Signaling	2.88	0.0199	MME,SEMA6D,SEMA4D,SEMA3D,WNT9B,NTRK3,PPP3R1,PLCL2,NRP1
Protein Kinase A Signaling	2.05	0.0175	YWHAQ,PPP3R1,DUSP10,AKAP6,PDE4B,PLCL2,AKAP1
D-myo-inositol (1,4,5,6)-Tetrakisphosphate Biosynthesis	2	0.0278	PPP1R13B,INPP5B,DUSP10,SSH3
D-myo-inositol (3,4,5,6)-tetrakisphosphate Biosynthesis	2	0.0278	PPP1R13B,INPP5B,DUSP10,SSH3
cAMP-mediated signaling	1.98	0.022	GLP1R,PPP3R1,AKAP6,PDE4B,AKAP1
3-phosphoinositide Degradation	1.87	0.0253	PPP1R13B,INPP5B,DUSP10,SSH3
D-myo-inositol-5-phosphate Metabolism	1.83	0.0247	PPP1R13B,INPP5B,DUSP10,SSH3
Biotin-carboxyl Carrier Protein Assembly	1.76	0.333	ACACB
Pentose Phosphate Pathway (Oxidative Branch)	1.64	0.25	G6PD
Antioxidant Action of Vitamin C	1.6	0.0278	PLCL2,NXN,PLD1
3-phosphoinositide Biosynthesis	1.53	0.02	PPP1R13B,INPP5B,DUSP10,SSH3
Serotonin and Melatonin Biosynthesis	1.46	0.167	TPH2
iCOS-iCOSL Signaling in T Helper Cells	1.46	0.0244	PPP3R1,PLEKHA3,ITK
Role of Macrophages, Fibroblasts and Endothelial Cells in Rheumatoid Arthritis	1.45	0.016	WNT9B,PPP3R1,DVL1,PLCL2,IRAK4
Semaphorin Signaling in Neurons	1.42	0.0377	SEMA4D,NRP1
Ceramide Biosynthesis	1.4	0.143	KDSR
Thioredoxin Pathway	1.4	0.143	NXN
Phosphatidylcholine Biosynthesis I	1.4	0.143	CHKA
PI3K Signaling in B Lymphocytes	1.4	0.0231	PPP3R1,PLCL2,PLEKHA3
p70S6K Signaling	1.38	0.0227	YWHAQ,PLCL2,PLD1
Cardiac β-adrenergic Signaling	1.32	0.0214	AKAP6,PDE4B,AKAP1
Superpathway of Inositol Phosphate Compounds	1.32	0.017	PPP1R13B,INPP5B,DUSP10,SSH3
PCP pathway	1.31	0.0328	WNT9B,DVL1
Phospholipases	1.3	0.0323	PLCL2,PLD1
Human Embryonic Stem Cell Pluripotency	1.29	0.021	WNT9B,NTRK3,DVL1
Pathogenesis of Multiple Sclerosis	1.29	0.111	CXCL10
Phosphatidylethanolamine Biosynthesis II	1.29	0.111	CHKA
Ovarian Cancer Signaling	1.29	0.0208	WNT9B,DVL1,EDNRA
Wnt/Ca+ pathway	1.28	0.0317	DVL1,PLCL2
Pentose Phosphate Pathway	1.21	0.0909	G6PD
Basal Cell Carcinoma Signaling	1.18	0.0278	WNT9B,DVL1
GPCR-Mediated Integration of Enteroendocrine Signaling Exemplified by an L Cell	1.17	0.0274	GLP1R,PLCL2
Pregnenolone Biosynthesis	1.17	0.0833	CYP46A1
Choline Biosynthesis III	1.14	0.0769	PLD1
Role of Wnt/GSK-3β Signaling in the Pathogenesis of Influenza	1.13	0.026	WNT9B,DVL1
Aldosterone Signaling in Epithelial Cells	1.13	0.0179	DNAJC6,PLCL2,HSPA12A
VDR/RXR Activation	1.12	0.0256	CXCL10,VDR
Histidine Degradation VI	1.08	0.0667	CYP46A1
Sertoli Cell-Sertoli Cell Junction Signaling	1.07	0.0169	EPN2,SORBS1,JAM2
Granzyme B Signaling	1.05	0.0625	DFFA
Vitamin-C Transport	1.05	0.0625	NXN
Neuregulin Signaling	1.03	0.0227	GRB7,TMEFF2
IL-4 Signaling	1.02	0.0225	INPP5B,NR3C1
Endothelin-1 Signaling	1	0.0158	EDNRA,PLCL2,PLD1
D-myo-inositol (1,4,5)-trisphosphate Degradation	1	0.0556	INPP5B
B Cell Receptor Signaling	1	0.0157	PAX5,PPP3R1,INPP5B
Ubiquinol-10 Biosynthesis (Eukaryotic)	0.98	0.0526	CYP46A1
1D-myo-inositol Hexakisphosphate Biosynthesis II (Mammalian)	0.98	0.0526	INPP5B
D-myo-inositol (1,3,4)-trisphosphate Biosynthesis	0.98	0.0526	INPP5B
Histamine Degradation	0.98	0.0526	ALDH1A3
Oxidative Ethanol Degradation III	0.939	0.0476	ALDH1A3
Endoplasmic Reticulum Stress Pathway	0.939	0.0476	MBTPS1
Fatty Acid α-oxidation	0.92	0.0455	ALDH1A3
Putrescine Degradation III	0.902	0.0435	ALDH1A3
Tumoricidal Function of Hepatic Natural Killer Cells	0.884	0.0417	DFFA
CDP-diacylglycerol Biosynthesis I	0.884	0.0417	GPAM
Superpathway of D-myo-inositol (1,4,5)-trisphosphate Metabolism	0.884	0.0417	INPP5B
T Cell Receptor Signaling	0.879	0.0183	PPP3R1,ITK
IL-17A Signaling in Gastric Cells	0.868	0.04	CXCL10
Tryptophan Degradation X (Mammalian, via Tryptamine)	0.868	0.04	ALDH1A3
Ethanol Degradation IV	0.868	0.04	ALDH1A3
p53 Signaling	0.866	0.018	TP53INP1,PPP1R13B
Phosphatidylglycerol Biosynthesis II (Non-plastidic)	0.852	0.0385	GPAM
PTEN Signaling	0.818	0.0168	NTRK3,INPP5B
Role of Osteoblasts, Osteoclasts and Chondrocytes in Rheumatoid Arthritis	0.813	0.0129	WNT9B,PPP3R1,DVL1
p38 MAPK Signaling	0.812	0.0167	DUSP10,IRAK4
Synaptic Long Term Potentiation	0.801	0.0164	PPP3R1,PLCL2
Role of NANOG in Mammalian Embryonic Stem Cell Pluripotency	0.801	0.0164	WNT9B,DVL1
PI3K/AKT Signaling	0.785	0.016	YWHAQ,INPP5B
Phospholipase C Signaling	0.782	0.0124	PPP3R1,PLD1,ITK
Atherosclerosis Signaling	0.774	0.0157	CD36,TNFSF14
Sperm Motility	0.774	0.0157	PDE4B,PLCL2
Cytotoxic T Lymphocyte-mediated Apoptosis of Target Cells	0.769	0.0312	DFFA
Estrogen Receptor Signaling	0.769	0.0156	TAF12,NR3C1
14-3-3-mediated Signaling	0.753	0.0153	YWHAQ,PLCL2
Cellular Effects of Sildenafil (Viagra)	0.753	0.0153	PDE4B,PLCL2
CD28 Signaling in T Helper Cells	0.748	0.0152	PPP3R1,ITK
Inhibition of Angiogenesis by TSP1	0.745	0.0294	CD36
Retinoate Biosynthesis I	0.745	0.0294	ALDH1A3
MIF-mediated Glucocorticoid Regulation	0.734	0.0286	NR3C1
Dopamine Degradation	0.712	0.027	ALDH1A3
Ethanol Degradation II	0.712	0.027	ALDH1A3
Netrin Signaling	0.692	0.0256	PPP3R1
Thyroid Cancer Signaling	0.682	0.025	NTRK3
Noradrenaline and Adrenaline Degradation	0.682	0.025	ALDH1A3
Epithelial Adherens Junction Signaling	0.682	0.0137	EPN2,SORBS1
tRNA Splicing	0.673	0.0244	PDE4B
Role of Hypercytokinemia/hyperchemokinemia in the Pathogenesis of Influenza	0.654	0.0233	CXCL10
Serotonin Receptor Signaling	0.654	0.0233	TPH2
Role of IL-17F in Allergic Inflammatory Airway Diseases	0.637	0.0222	CXCL10
iNOS Signaling	0.637	0.0222	IRAK4
Triacylglycerol Biosynthesis	0.629	0.0217	GPAM
nNOS Signaling in Neurons	0.62	0.0213	PPP3R1
Gαq Signaling	0.62	0.0124	PPP3R1,PLD1
Glioblastoma Multiforme Signaling	0.616	0.0123	WNT9B,PLCL2
Dopamine-DARPP32 Feedback in cAMP Signaling	0.608	0.0122	PPP3R1,PLCL2
Cell Cycle: G2/M DNA Damage Checkpoint Regulation	0.605	0.0204	YWHAQ
Assembly of RNA Polymerase II Complex	0.597	0.02	TAF12
Cdc42 Signaling	0.597	0.012	CDC42BPA,ITK
Wnt/β-catenin Signaling	0.579	0.0116	WNT9B,DVL1
Germ Cell-Sertoli Cell Junction Signaling	0.575	0.0116	EPN2,SORBS1
Neuroinflammation Signaling Pathway	0.568	0.00965	CXCL10,PPP3R1,IRAK4
Unfolded protein response	0.562	0.0182	MBTPS1
PPARα/RXRα Activation	0.551	0.0111	CD36,PLCL2
NF-κB Signaling	0.548	0.011	NTRK3,IRAK4
Nur77 Signaling in T Lymphocytes	0.536	0.0169	PPP3R1
Role of NFAT in Regulation of the Immune Response	0.532	0.0108	PPP3R1,ITK
Induction of Apoptosis by HIV1	0.524	0.0164	DFFA
Regulation of the Epithelial-Mesenchymal Transition Pathway	0.522	0.0106	WNT9B,DVL1
Role of NFAT in Cardiac Hypertrophy	0.51	0.0104	PPP3R1,PLCL2
Gap Junction Signaling	0.504	0.0103	PPP3R1,PLCL2
Glucocorticoid Receptor Signaling	0.502	0.00885	TAF12,PPP3R1,NR3C1
PXR/RXR Activation	0.501	0.0154	NR3C1
IL-8 Signaling	0.498	0.0102	IRAK4,PLD1
Calcium-induced T Lymphocyte Apoptosis	0.496	0.0152	PPP3R1
ERK5 Signaling	0.496	0.0152	YWHAQ
Lymphotoxin β Receptor Signaling	0.49	0.0149	TNFSF14
Agrin Interactions at Neuromuscular Junction	0.48	0.0145	DVL1
Myc Mediated Apoptosis Signaling	0.475	0.0143	YWHAQ
Melatonin Signaling	0.465	0.0139	PLCL2
Role of MAPK Signaling in the Pathogenesis of Influenza	0.465	0.0139	CXCL10
GM-CSF Signaling	0.46	0.0137	PPP3R1
Leukocyte Extravasation Signaling	0.46	0.00948	JAM2,ITK
STAT3 Pathway	0.455	0.0135	NTRK3
Serotonin Degradation	0.446	0.0132	ALDH1A3
Toll-like Receptor Signaling	0.446	0.0132	IRAK4
Neurotrophin/TRK Signaling	0.441	0.013	NTRK3
Integrin Signaling	0.439	0.00913	TSPAN3,GRB7
Angiopoietin Signaling	0.437	0.0128	GRB7
Regulation of IL-2 Expression in Activated and Anergic T Lymphocytes	0.428	0.0125	PPP3R1
IL-3 Signaling	0.416	0.012	PPP3R1
Prolactin Signaling	0.416	0.012	NR3C1
IL-17 Signaling	0.408	0.0118	CXCL10
Leptin Signaling in Obesity	0.404	0.0116	PLCL2
GPCR-Mediated Nutrient Sensing in Enteroendocrine Cells	0.404	0.0116	PLCL2
HIPPO signaling	0.4	0.0115	YWHAQ
TGF-β Signaling	0.4	0.0115	VDR
Cardiac Hypertrophy Signaling	0.399	0.00847	PPP3R1,PLCL2
VEGF Family Ligand-Receptor Interactions	0.396	0.0114	NRP1
Apoptosis Signaling	0.389	0.0111	DFFA
PDGF Signaling	0.389	0.0111	INPP5B
IL-7 Signaling Pathway	0.385	0.011	PAX5
Factors Promoting Cardiogenesis in Vertebrates	0.381	0.0109	DVL1
IL-1 Signaling	0.381	0.0109	IRAK4
Fcγ Receptor-mediated Phagocytosis in Macrophages and Monocytes	0.378	0.0108	PLD1
Death Receptor Signaling	0.378	0.0108	DFFA
Communication between Innate and Adaptive Immune Cells	0.374	0.0106	CXCL10
Colorectal Cancer Metastasis Signaling	0.373	0.00806	WNT9B,DVL1
Sumoylation Pathway	0.368	0.0104	NR3C1
RANK Signaling in Osteoclasts	0.348	0.0098	PPP3R1
SAPK/JNK Signaling	0.342	0.00962	DUSP10
Protein Ubiquitination Pathway	0.34	0.00755	DNAJC6,HSPA12A
Mouse Embryonic Stem Cell Pluripotency	0.336	0.00943	DVL1
UVA-Induced MAPK Signaling	0.336	0.00943	PLCL2
IGF-1 Signaling	0.336	0.00943	YWHAQ
Gαs Signaling	0.324	0.00909	GLP1R
G-Protein Coupled Receptor Signaling	0.321	0.00725	GLP1R,PDE4B
Neuropathic Pain Signaling In Dorsal Horn Neurons	0.311	0.0087	PLCL2
Rac Signaling	0.305	0.00855	PLD1
Fc Epsilon RI Signaling	0.3	0.0084	INPP5B
Neuroprotective Role of THOP1 in Alzheimer's Disease	0.3	0.0084	MME
Pancreatic Adenocarcinoma Signaling	0.298	0.00833	PLD1
Sirtuin Signaling Pathway	0.296	0.00687	GABARAPL1,G6PD
LXR/RXR Activation	0.295	0.00826	CD36
Natural Killer Cell Signaling	0.293	0.0082	INPP5B
fMLP Signaling in Neutrophils	0.29	0.00813	PPP3R1
RhoA Signaling	0.288	0.00806	PLD1
Sphingosine-1-phosphate Signaling	0.286	0.008	PLCL2
Gustation Pathway	0.281	0.00787	PDE4B
Type II Diabetes Mellitus Signaling	0.279	0.00781	CD36
Phagosome Formation	0.274	0.00769	PLCL2
PKCθ Signaling in T Lymphocytes	0.267	0.00752	PPP3R1
P2Y Purigenic Receptor Signaling Pathway	0.265	0.00746	PLCL2
Adipogenesis pathway	0.265	0.00746	NR1D2
Aryl Hydrocarbon Receptor Signaling	0.251	0.00709	ALDH1A3
Insulin Receptor Signaling	0.251	0.00709	INPP5B
Synaptic Long Term Depression	0.237	0.00676	PLCL2
Relaxin Signaling	0.221	0.00637	PDE4B
Hepatic Cholestasis	0.216	0.00625	IRAK4
Tight Junction Signaling	0.205	0.00599	JAM2
Acute Phase Response Signaling	0.201	0.00588	NR3C1
Tec Kinase Signaling	0.201	0.00588	ITK
